# Supplementary material for: Age-related changes in microRNA levels in serum
Source: publisher site journal article supplement (doi:10.18632/aging.100603), 2013-09-27
Supplement: Supplementary file 1 [file aging-v5i10-100603-supplementary-material-SD2.xlsx]

## Sheet: input
SYMBOL	ENTREZ_GENE_ID	Expression	(zratio) miR1248/Con	(fold change) miR-1248/Con
C1orf116	79098	down	-9.03	-6.08
ZNF185	7739	down	-8.93	-5.81
ACTC1	70	down	-8.71	-5.51
LOC100129668	100129668	down	-8.25	-5.03
TMX1	81542	down	-7.68	-4.47
LYPD3	27076	down	-7.67	-4.61
MDK	4192	down	-7.66	-4.55
TUBB2B	347733	down	-7.58	-4.52
CYBRD1	79901	down	-7.56	-4.46
AMTN	401138	down	-7.55	-4.43
IL8	3576	down	-7.46	-4.36
GJB3	2707	down	-7.42	-4.38
MICA	4276	down	-7.33	-4.23
ANKRD52	283373	down	-7.05	-4.1
H2AFY	9555	down	-7.04	-3.99
S100P	6286	down	-6.84	-3.84
OSBP2	23762	down	-6.84	-3.82
DUSP1	1843	down	-6.83	-3.78
PRSS3	5646	down	-6.69	-3.81
TRAK1	22906	down	-6.66	-3.76
LOC650517	650517	down	-6.6	-3.63
WARS	7453	down	-6.59	-3.62
IL6	3569	down	-6.56	-3.63
FABP3	2170	down	-6.35	-3.56
LAMB3	3914	down	-6.29	-3.47
PALM	5064	down	-6.28	-3.47
TMEM14A	28978	down	-6.25	-3.38
CLIC3	9022	down	-6.14	-3.34
FST	10468	down	-6.14	-3.38
LOXL1	4016	down	-6.1	-3.37
TNFAIP1	7126	down	-6.02	-3.28
KIAA0363	23148	down	-5.99	-3.31
TIMP3	7078	down	-5.88	-3.17
CDC2L6	23097	down	-5.85	-3.18
L1CAM	3897	down	-5.65	-3.07
HIST1H2BJ	8970	down	-5.63	-3.01
LOC648526	648526	down	-5.63	-3.07
CRIP2	1397	down	-5.56	-3.01
PSG3	5671	down	-5.52	-3.02
PSG6	5675	down	-5.47	-3.02
HLA-B	3106	down	-5.46	-2.93
CXCL1	2919	down	-5.43	-2.96
PSG4	5672	down	-5.42	-2.97
BCAS4	55653	down	-5.4	-2.9
RBM38	55544	down	-5.38	-2.93
PTGES	9536	down	-5.36	-2.8
CKB	1152	down	-5.34	-2.81
ITGB4	3691	down	-5.33	-2.9
CRABP2	1382	down	-5.29	-2.91
PPAP2B	8613	down	-5.28	-2.86
ITPK1	3705	down	-5.26	-2.85
MICALL1	85377	down	-5.23	-2.79
PHC2	1912	down	-5.22	-2.83
TBC1D2B	23102	down	-5.2	-2.8
EPDR1	54749	down	-5.17	-2.77
SPINT2	10653	down	-5.12	-2.76
KRT17P3	729682	down	-5.12	-2.66
FAM83A	84985	down	-5.12	-2.76
CDS1	1040	down	-5.12	-2.78
LPAR5	57121	down	-5.08	-2.77
PI3	5266	down	-5.06	-2.75
KDELR3	11015	down	-5.04	-2.73
KRT16	3868	down	-5.02	-2.62
RPIA	22934	down	-4.96	-2.68
LOC653610	653610	down	-4.94	-2.66
TBC1D2	55357	down	-4.9	-2.61
TMEM50B	757	down	-4.88	-2.64
DMBT1	1755	down	-4.86	-2.64
BCL7B	9275	down	-4.85	-2.64
TMEM19	55266	down	-4.78	-2.62
KRT75	9119	down	-4.77	-2.59
HMOX1	3162	down	-4.77	-2.55
CSPG4	1464	down	-4.72	-2.56
ASF1B	55723	down	-4.71	-2.41
PITPNM1	9600	down	-4.7	-2.48
CALB2	794	down	-4.69	-2.58
CRIP1	1396	down	-4.66	-2.44
CFD	1675	down	-4.66	-2.47
IKBIP	121457	down	-4.66	-2.54
C9orf86	55684	down	-4.65	-2.51
NUP210	23225	down	-4.65	-2.5
STMN3	50861	down	-4.65	-2.52
HIST2H2AA3	8337	down	-4.64	-2.48
HIST2H2AC	8338	down	-4.63	-2.45
FYCO1	79443	down	-4.63	-2.53
CYP26B1	56603	down	-4.62	-2.51
MFAP5	8076	down	-4.59	-2.49
TNFRSF25	8718	down	-4.59	-2.48
JUNB	3726	down	-4.59	-2.51
HYAL1	3373	down	-4.57	-2.5
NGF	4803	down	-4.57	-2.46
DGCR2	9993	down	-4.57	-2.45
GSN	2934	down	-4.56	-2.49
DYRK1B	9149	down	-4.55	-2.48
CGB5	93659	down	-4.55	-2.46
RALBP1	10928	down	-4.54	-2.49
AIF1L	83543	down	-4.54	-2.47
SEMA3B	7869	down	-4.54	-2.46
CRLF1	9244	down	-4.53	-2.48
APPL2	55198	down	-4.5	-2.46
AP1S2	8905	down	-4.49	-2.44
C9orf169	375791	down	-4.49	-2.4
SEMA3F	6405	down	-4.43	-2.37
GLTP	51228	down	-4.39	-2.35
KCTD10	83892	down	-4.39	-2.4
FAM83H	286077	down	-4.38	-2.35
SYT11	23208	down	-4.38	-2.39
LRP1	4035	down	-4.37	-2.39
C13orf27	93081	down	-4.36	-2.37
CKAP4	10970	down	-4.36	-2.32
MYD88	4615	down	-4.35	-2.38
ATF3	467	down	-4.35	-2.37
IGFBP6	3489	down	-4.35	-2.34
OAZ2	4947	down	-4.34	-2.33
CENPF	1063	down	-4.31	-2.34
HIST1H3D	8351	down	-4.3	-2.36
SLC9A2	6549	down	-4.3	-2.37
GDPD3	79153	down	-4.3	-2.38
EPB41L5	57669	down	-4.3	-2.36
LFNG	3955	down	-4.3	-2.34
F2RL1	2150	down	-4.27	-2.34
GPR161	23432	down	-4.27	-2.36
RNF149	284996	down	-4.27	-2.3
SYDE1	85360	down	-4.26	-2.33
SMTN	6525	down	-4.26	-2.35
HBEGF	1839	down	-4.24	-2.3
RHOF	54509	down	-4.24	-2.35
2013-03-04	57574	down	-4.24	-2.31
C5orf46	389336	down	-4.23	-2.3
FAM189B	10712	down	-4.23	-2.32
TRIM29	23650	down	-4.21	-2.34
APOE	348	down	-4.21	-2.33
SLC35E4	339665	down	-4.18	-2.32
HIST1H4H	8365	down	-4.18	-2.26
TGFA	7039	down	-4.18	-2.31
NES	10763	down	-4.18	-2.31
SPINK1	6690	down	-4.17	-2.31
DNAJB5	25822	down	-4.16	-2.31
CNN1	1264	down	-4.16	-2.37
GNS	2799	down	-4.15	-2.22
FAM57A	79850	down	-4.14	-2.25
POLG	5428	down	-4.13	-2.27
LOC100132761	100132761	down	-4.13	-2.1
SLC29A1	2030	down	-4.13	-2.26
HES4	57801	down	-4.12	-2.24
EDC3	80153	down	-4.12	-2.28
DNER	92737	down	-4.11	-2.23
ABLIM3	22885	down	-4.09	-2.24
STXBP1	6812	down	-4.08	-2.27
LOC645381	645381	down	-4.08	-2.24
PLCD3	113026	down	-4.08	-2.26
MAP3K9	4293	down	-4.07	-2.27
PLAGL2	5326	down	-4.07	-2.24
RASSF1	11186	down	-4.06	-2.26
NUAK2	81788	down	-4.06	-2.27
SULF2	55959	down	-4.05	-2.24
RNF103	7844	down	-4.05	-2.25
MAFF	23764	down	-4.03	-2.24
BTBD1	53339	down	-4.02	-2.22
MAGED2	10916	down	-4.01	-2.22
CHST7	56548	down	-4.01	-2.23
FOXM1	2305	down	-4	-2.22
SCARB2	950	down	-4	-2.18
STARD10	10809	down	-3.98	-2.21
PAQR4	124222	down	-3.97	-2.17
ASB13	79754	down	-3.97	-2.22
KRT19	3880	down	-3.94	-2.2
CDKN1A	1026	down	-3.94	-2.12
MKNK2	2872	down	-3.93	-2.19
EPHA2	1969	down	-3.93	-2.17
OCRL	4952	down	-3.92	-2.17
ISG20	3669	down	-3.92	-2.16
CUTL1	1523	down	-3.92	-2.16
KLF6	1316	down	-3.91	-2.13
CCDC92	80212	down	-3.91	-2.18
RNF165	494470	down	-3.9	-2.16
TBXA2R	6915	down	-3.9	-2.2
FAM111A	63901	down	-3.9	-2.16
F3	2152	down	-3.9	-2.14
SDC1	6382	down	-3.9	-2.16
PPP2R2C	5522	down	-3.89	-2.19
SHANK3	85358	down	-3.88	-2.17
NRP1	8829	down	-3.88	-2.16
TMEM165	55858	down	-3.87	-2.17
UBXN1	51035	down	-3.86	-2.12
MAPK8IP1	9479	down	-3.85	-2.18
ZCCHC24	219654	down	-3.85	-2.16
POGK	57645	down	-3.85	-2.12
TMEM54	113452	down	-3.84	-2.17
HIST1H2BD	3017	down	-3.82	-2.08
SLC6A9	6536	down	-3.81	-2.14
COL4A2	1284	down	-3.8	-2.08
ETV4	2118	down	-3.8	-2.13
PDGFRL	5157	down	-3.8	-2.12
OLR1	4973	down	-3.8	-2.12
CYB5R4	51167	down	-3.79	-2.13
TNNC1	7134	down	-3.77	-2.16
KRT81	3887	down	-3.77	-2.13
DDR1	780	down	-3.75	-2.1
NIPAL4	348938	down	-3.75	-2.13
TMEM184B	25829	down	-3.74	-2.05
TGM2	7052	down	-3.73	-2.06
TNFAIP8	25816	down	-3.73	-2.08
ENO2	2026	down	-3.73	-2.12
TRIML2	205860	down	-3.73	-2.13
DUSP5	1847	down	-3.73	-2.08
TUSC2	11334	down	-3.7	-2.09
NAGPA	51172	down	-3.7	-2.08
STMN1	3925	down	-3.69	-2.04
SLC39A3	29985	down	-3.69	-2.05
SCARB1	949	down	-3.68	-2.04
CDK2	1017	down	-3.68	-2.05
NBPF14	25832	down	-3.68	-2.11
ZC3H12A	80149	down	-3.67	-2.06
NUPR1	26471	down	-3.67	-2.05
LOC100128918	100128918	down	-3.67	-2.1
MTMR12	54545	down	-3.66	-2.06
TMEM206	55248	down	-3.64	-2.07
C5orf32	84418	down	-3.64	-2.04
HN1	51155	down	-3.64	-2.04
VAMP3	9341	down	-3.64	-2.04
TK1	7083	down	-3.63	-2.04
RELB	5971	down	-3.63	-2.08
C2orf29	55571	down	-3.62	-2.02
CNOT6	57472	down	-3.61	-2.06
TYMS	7298	down	-3.61	-2.02
ECM1	1893	down	-3.6	-2.08
NOTCH1	4851	down	-3.6	-2.02
GPRC5A	9052	down	-3.6	-2
GDPD5	81544	down	-3.59	-2.05
NCRNA00161	118421	down	-3.59	-2.07
TMEM132A	54972	down	-3.58	-2.02
PCBP4	57060	down	-3.57	-2.02
MSLN	10232	down	-3.55	-2.01
OSBPL3	26031	down	-3.55	-2.04
VWA5A	4013	down	-3.52	-2.04
MFAP3	4238	down	-3.52	-2.03
ATG9A	79065	down	-3.52	-2
STX1A	6804	down	-3.52	-1.98
C1orf133	574036	down	-3.51	-2.05
GOLT1B	51026	down	-3.51	-2.03
TUBG1	7283	down	-3.51	-2.02
ZDHHC24	254359	down	-3.5	-2.04
C21orf100	118421	down	-3.5	-2.03
SRD5A1	6715	down	-3.49	-1.97
CYLN2	7461	down	-3.49	-2
TNS1	7145	down	-3.49	-2.04
BTBD3	22903	down	-3.47	-1.99
KIAA1522	57648	down	-3.47	-1.99
DSP	1832	down	-3.46	-1.99
RHOD	29984	down	-3.46	-1.98
CDCP1	64866	down	-3.46	-1.98
SGPL1	8879	down	-3.45	-1.99
C5orf15	56951	down	-3.45	-1.95
ADAM17	6868	down	-3.45	-1.99
ADAMTSL5	339366	down	-3.44	-2.02
ST6GALNAC6	30815	down	-3.44	-1.97
PLAUR	5329	down	-3.44	-1.95
LOC151162	151162	down	-3.43	-1.95
HRASLS3	11145	down	-3.43	-1.96
CACNB3	784	down	-3.42	-1.97
EML1	2009	down	-3.41	-1.99
FLRT2	23768	down	-3.41	-1.99
TRIM47	91107	down	-3.41	-1.97
PREI3	25843	down	-3.4	-1.97
C18orf10	25941	down	-3.4	-1.95
ETS2	2114	down	-3.4	-1.94
NT5DC2	64943	down	-3.4	-1.94
HCCS	3052	down	-3.38	-1.94
FAM38A	9780	down	-3.38	-1.93
C3orf39	84892	down	-3.38	-1.95
MAPK7	5598	down	-3.37	-1.99
CTXN1	404217	down	-3.37	-1.94
MAPRE3	22924	down	-3.37	-1.97
CAMKK2	10645	down	-3.37	-1.96
COL1A1	1277	down	-3.37	-1.93
NKX3-1	4824	down	-3.36	-1.96
FSTL3	10272	down	-3.36	-1.9
SFN	2810	down	-3.36	-1.94
ZNF76	7629	down	-3.36	-2.01
FGFR3	2261	down	-3.36	-1.97
HAUS8	93323	down	-3.35	-1.96
POMT1	10585	down	-3.35	-1.94
LOC728734	728734	down	-3.33	-1.93
LMNB1	4001	down	-3.33	-1.95
PKD1	5310	down	-3.33	-1.89
TOB1	10140	down	-3.33	-1.91
LEPREL2	10536	down	-3.33	-1.93
CGB1	114335	down	-3.33	-1.96
CHST15	51363	down	-3.32	-1.93
B4GALT4	8702	down	-3.31	-1.92
SLC30A3	7781	down	-3.31	-1.95
PDXK	8566	down	-3.31	-1.9
SPANXA2	728712	down	-3.31	-1.94
LRPAP1	4043	down	-3.3	-1.92
CENPBD1	92806	down	-3.3	-1.95
LOC653888	653888	down	-3.3	-1.9
TP53INP2	58476	down	-3.3	-1.95
LOC642590	642590	down	-3.3	-1.87
ERRFI1	54206	down	-3.3	-1.91
KIF2C	11004	down	-3.29	-1.92
RBL2	5934	down	-3.29	-1.93
RAB40B	10966	down	-3.29	-1.94
GPN2	54707	down	-3.29	-1.9
C16orf74	404550	down	-3.29	-1.95
ANKRD38	163782	down	-3.28	-1.94
GPSM2	29899	down	-3.27	-1.92
DBNDD1	79007	down	-3.27	-1.92
PRKAA1	5562	down	-3.27	-1.93
PTGER2	5732	down	-3.27	-1.95
PNPLA6	10908	down	-3.26	-1.9
LOC387763	387763	down	-3.26	-1.93
PHF19	26147	down	-3.26	-1.92
RBPMS2	348093	down	-3.26	-1.91
MXD1	4084	down	-3.26	-1.94
CHST3	9469	down	-3.25	-1.9
EPAS1	2034	down	-3.25	-1.89
RAD54L	8438	down	-3.24	-1.9
UHRF1	29128	down	-3.24	-1.87
FZD5	7855	down	-3.24	-1.93
SH3BGRL3	83442	down	-3.24	-1.87
DENND5A	23258	down	-3.23	-1.88
BVES	11149	down	-3.23	-1.91
JPH3	57338	down	-3.21	-1.91
H2AFJ	55766	down	-3.21	-1.84
RAB11FIP5	26056	down	-3.2	-1.88
RAB17	64284	down	-3.2	-1.91
HIST1H4E	8367	down	-3.19	-1.9
TAPBP	6892	down	-3.19	-1.87
WFDC3	140686	down	-3.19	-1.91
FAM101B	359845	down	-3.19	-1.91
SLPI	6590	down	-3.18	-1.75
TMUB2	79089	down	-3.18	-1.88
CDRT4	284040	down	-3.18	-1.91
MYO1C	4641	down	-3.17	-1.88
LOC646576	646576	down	-3.17	-1.9
CDC25B	994	down	-3.16	-1.85
RAB22A	57403	down	-3.16	-1.88
LRP4	4038	down	-3.15	-1.9
MAP4	4134	down	-3.15	-1.89
P8	26471	down	-3.15	-1.89
BAD	572	down	-3.15	-1.86
ANXA8	244	down	-3.12	-1.83
POLE	5426	down	-3.12	-1.85
OXSR1	9943	down	-3.12	-1.83
MRPL16	54948	down	-3.12	-1.84
C19orf33	64073	down	-3.12	-1.85
CXXC5	51523	down	-3.11	-1.83
SAMD4B	55095	down	-3.11	-1.87
KLF13	51621	down	-3.11	-1.85
SMG7	9887	down	-3.11	-1.87
TNKS1BP1	85456	down	-3.11	-1.87
TMEM173	340061	down	-3.11	-1.86
DUSP8	1850	down	-3.1	-1.89
FAM73B	84895	down	-3.1	-1.85
CA12	771	down	-3.09	-1.81
C19orf64	100113377	down	-3.09	-1.87
CAPN5	726	down	-3.09	-1.88
TAP1	6890	down	-3.09	-1.83
GALNT11	63917	down	-3.08	-1.84
SIRPA	140885	down	-3.07	-1.85
SPANXB1	728695	down	-3.07	-1.83
PLTP	5360	down	-3.07	-1.85
HYAL2	8692	down	-3.06	-1.83
RASAL2	9462	down	-3.06	-1.85
LOC650909	650909	down	-3.06	-1.76
BATF3	55509	down	-3.06	-1.86
MEGF6	1953	down	-3.06	-1.84
GALNT4	8693	down	-3.06	-1.86
ADARB1	104	down	-3.05	-1.83
F8A1	8263	down	-3.04	-1.84
IL12A	3592	down	-3.03	-1.86
DKK1	22943	down	-3.03	-1.78
RASD1	51655	down	-3.02	-1.85
IRS1	3667	down	-3.01	-1.84
IRAK2	3656	down	-3.01	-1.83
GAS6	2621	down	-3.01	-1.82
LOC387882	387882	down	-3.01	-1.79
SEPN1	57190	down	-3	-1.84
SDC4	6385	down	-3	-1.81
SPANXB2	100133171	down	-3	-1.81
NGEF	25791	down	-2.99	-1.84
FEM1C	56929	down	-2.99	-1.81
PTK7	5754	down	-2.99	-1.83
KCNN4	3783	down	-2.99	-1.81
PPP1R13L	10848	down	-2.98	-1.81
CMTM4	146223	down	-2.98	-1.82
RECQL4	9401	down	-2.98	-1.84
HIST2H4A	8370	down	-2.98	-1.8
WWC3	55841	down	-2.97	-1.82
RALGDS	5900	down	-2.97	-1.78
PFTK1	5218	down	-2.97	-1.82
TCIRG1	10312	down	-2.97	-1.79
HLA-A	3105	down	-2.96	-1.77
CLCC1	23155	down	-2.96	-1.81
LRRC49	54839	down	-2.96	-1.83
HLA-E	3133	down	-2.95	-1.8
ACOT7	11332	down	-2.94	-1.75
SLCO2A1	6578	down	-2.94	-1.81
AFTPH	54812	down	-2.94	-1.8
SESN2	83667	down	-2.94	-1.82
EDN1	1906	down	-2.94	-1.8
C9orf167	54863	down	-2.93	-1.76
BAK1	578	down	-2.93	-1.8
ARSJ	79642	down	-2.93	-1.81
APLP2	334	down	-2.93	-1.78
CDCA8	55143	down	-2.93	-1.78
CPA4	51200	down	-2.93	-1.74
HDAC7	51564	down	-2.93	-1.8
DLGAP4	22839	down	-2.93	-1.79
CLIP2	7461	down	-2.93	-1.8
S100A2	6273	down	-2.93	-1.8
C7orf10	79783	down	-2.92	-1.81
NEURL1B	54492	down	-2.92	-1.81
NONO	4841	down	-2.92	-1.78
KLC2	64837	down	-2.92	-1.8
LOC441714	441714	down	-2.92	-1.82
UCN2	90226	down	-2.91	-1.79
ATP7A	538	down	-2.91	-1.82
FREQ	23413	down	-2.91	-1.76
FOXC2	2303	down	-2.91	-1.78
SLC35C1	55343	down	-2.91	-1.76
ABHD10	55347	down	-2.9	-1.79
SORT1	6272	down	-2.9	-1.79
LOC643911	643911	down	-2.9	-1.79
HIST2H2AA4	723790	down	-2.9	-1.74
ABCB10	23456	down	-2.9	-1.8
GPRIN1	114787	down	-2.89	-1.78
SLC44A2	57153	down	-2.89	-1.78
GDF15	9518	down	-2.89	-1.75
LOC728006	728006	down	-2.89	-1.78
ITPKA	3706	down	-2.89	-1.8
ABHD12	26090	down	-2.89	-1.79
ASNS	440	down	-2.88	-1.75
MAFB	9935	down	-2.88	-1.77
COL12A1	1303	down	-2.88	-1.76
MSRB3	253827	down	-2.88	-1.79
CBL	867	down	-2.88	-1.78
CD83	9308	down	-2.88	-1.79
PACS1	55690	down	-2.87	-1.76
ARL1	400	down	-2.87	-1.78
PORCN	64840	down	-2.86	-1.78
AOX1	316	down	-2.86	-1.77
MGAT4B	11282	down	-2.86	-1.73
PRRT3	285368	down	-2.86	-1.78
NRBP1	29959	down	-2.86	-1.77
RPP25	54913	down	-2.86	-1.76
PRRC1	133619	down	-2.86	-1.75
VAT1	10493	down	-2.85	-1.71
HIST1H2BG	8339	down	-2.84	-1.77
MAP3K12	7786	down	-2.84	-1.79
AHNAK2	113146	down	-2.84	-1.72
FN3KRP	79672	down	-2.83	-1.72
SMS	6611	down	-2.83	-1.71
AFG3L1	172	down	-2.83	-1.79
GOLGA3	2802	down	-2.83	-1.74
H1F0	3005	down	-2.83	-1.75
ANKLE2	23141	down	-2.82	-1.74
CALR	811	down	-2.82	-1.71
F2R	2149	down	-2.82	-1.73
YOD1	55432	down	-2.82	-1.74
S100A3	6274	down	-2.81	-1.74
FBXO18	84893	down	-2.81	-1.74
PVRL2	5819	down	-2.81	-1.74
LAMA4	3910	down	-2.81	-1.74
C1orf106	55765	down	-2.81	-1.78
CREB3L2	64764	down	-2.8	-1.73
BCKDHB	594	down	-2.8	-1.78
FICD	11153	down	-2.8	-1.78
LPPR2	64748	down	-2.8	-1.77
RPS6KA4	8986	down	-2.8	-1.73
C10orf32	119032	down	-2.79	-1.73
RFX7	64864	down	-2.79	-1.75
UBE3B	89910	down	-2.79	-1.75
C10orf35	219738	down	-2.78	-1.76
ABTB1	80325	down	-2.78	-1.76
BDKRB1	623	down	-2.78	-1.76
KIF26A	26153	down	-2.77	-1.76
E2F2	1870	down	-2.77	-1.67
TGM1	7051	down	-2.77	-1.76
C9orf69	90120	down	-2.77	-1.71
HYI	81888	down	-2.76	-1.74
GAPVD1	26130	down	-2.76	-1.73
SLC24A6	80024	down	-2.76	-1.73
LOC389286	389286	down	-2.76	-1.68
FLII	2314	down	-2.75	-1.72
CALM1	801	down	-2.75	-1.7
PIGT	51604	down	-2.75	-1.71
SLC25A24	29957	down	-2.75	-1.76
CENPT	80152	down	-2.75	-1.74
KLHL29	114818	down	-2.75	-1.73
BTG3	10950	down	-2.75	-1.71
RIPK1	8737	down	-2.75	-1.75
MTHFD2	10797	down	-2.74	-1.71
EMP3	2014	down	-2.74	-1.68
TUBB2A	7280	down	-2.74	-1.72
TGFBR2	7048	down	-2.74	-1.69
OTUD5	55593	down	-2.74	-1.74
PRC1	9055	down	-2.73	-1.69
KLF2	10365	down	-2.73	-1.68
2013-09-02	4735	down	-2.73	-1.69
TFDP1	7027	down	-2.72	-1.68
PPP1R12C	54776	down	-2.72	-1.74
MUC1	4582	down	-2.72	-1.7
LOC646347	646347	down	-2.72	-1.67
EXTL3	2137	down	-2.71	-1.72
ENO3	2027	down	-2.71	-1.68
ABCA2	20	down	-2.71	-1.74
TBC1D10B	26000	down	-2.71	-1.71
SPTLC1	10558	down	-2.71	-1.73
TCTA	6988	down	-2.71	-1.73
STBD1	8987	down	-2.71	-1.74
SP2	6668	down	-2.7	-1.74
TAF2	6873	down	-2.7	-1.71
RASA3	22821	down	-2.7	-1.72
EIF4G3	8672	down	-2.7	-1.72
CAMK2N1	55450	down	-2.7	-1.74
PLXNA3	55558	down	-2.7	-1.7
DDX41	51428	down	-2.7	-1.71
PPP2R2D	55844	down	-2.7	-1.7
HMG20B	10362	down	-2.7	-1.69
MED10	84246	down	-2.7	-1.67
AES	166	down	-2.69	-1.69
PCK2	5106	down	-2.69	-1.72
KIAA1267	284058	down	-2.69	-1.72
AP4E1	23431	down	-2.69	-1.71
CNTNAP1	8506	down	-2.69	-1.7
DDAH2	23564	down	-2.69	-1.72
LRRC8A	56262	down	-2.69	-1.69
CYFIP2	26999	down	-2.69	-1.74
HES6	55502	down	-2.69	-1.74
LMO1	4004	down	-2.69	-1.71
PDE6D	5147	down	-2.68	-1.71
HDAC7A	51564	down	-2.68	-1.73
CHN1	1123	down	-2.68	-1.7
GNAI2	2771	down	-2.67	-1.67
SAPS1	22870	down	-2.67	-1.73
MAPK13	5603	down	-2.67	-1.71
LONP1	9361	down	-2.67	-1.69
ACADVL	37	down	-2.66	-1.7
ST3GAL1	6482	down	-2.66	-1.69
TLN2	83660	down	-2.66	-1.71
HIST1H3F	8968	down	-2.66	-1.71
BPGM	669	down	-2.66	-1.7
LOC399491	399491	down	-2.66	-1.71
TSPAN9	10867	down	-2.66	-1.68
IL32	9235	down	-2.65	-1.71
MBD2	8932	down	-2.65	-1.72
PITRM1	10531	down	-2.65	-1.68
FKBP9L	360132	down	-2.65	-1.67
GLT25D1	79709	down	-2.65	-1.65
IGFBP4	3487	down	-2.65	-1.68
ZFP64	55734	down	-2.64	-1.71
HAGH	3029	down	-2.64	-1.7
COL4A1	1282	down	-2.64	-1.64
STX2	2054	down	-2.64	-1.69
PPP1R3F	89801	down	-2.63	-1.71
ARHGEF17	9828	down	-2.63	-1.71
IFI30	10437	down	-2.63	-1.67
SNORD21	6083	down	-2.63	-1.7
SLC2A8	29988	down	-2.63	-1.68
CD9	928	down	-2.63	-1.69
FAM65A	79567	down	-2.63	-1.68
POLM	27434	down	-2.63	-1.71
SLC7A6	9057	down	-2.62	-1.69
SFXN5	94097	down	-2.62	-1.7
AXL	558	down	-2.62	-1.65
CARS	833	down	-2.62	-1.68
TPRG1L	127262	down	-2.61	-1.64
ZFP90	146198	down	-2.61	-1.71
TBX2	6909	down	-2.6	-1.71
CLCF1	23529	down	-2.6	-1.69
C5orf25	375484	down	-2.6	-1.7
CNNM4	26504	down	-2.59	-1.7
ITPR3	3710	down	-2.59	-1.63
CYB561	1534	down	-2.58	-1.67
PCGF2	7703	down	-2.58	-1.68
PGLS	25796	down	-2.58	-1.66
PXMP2	5827	down	-2.58	-1.65
TRNP1	388610	down	-2.58	-1.68
IL1B	3553	down	-2.58	-1.69
HIST1H3H	8357	down	-2.57	-1.7
KCTD14	65987	down	-2.57	-1.69
DYNC1H1	1778	down	-2.57	-1.64
NT5C3	51251	down	-2.57	-1.66
MAF1	84232	down	-2.56	-1.67
ARL2BP	23568	down	-2.56	-1.65
TTC8	123016	down	-2.56	-1.68
RABGAP1	23637	down	-2.56	-1.65
NICN1	84276	down	-2.56	-1.67
BMP1	649	down	-2.56	-1.66
FERMT1	55612	down	-2.56	-1.67
TNC	3371	down	-2.55	-1.65
SND1	27044	down	-2.55	-1.65
ORAI2	80228	down	-2.55	-1.69
SESTD1	91404	down	-2.55	-1.68
UBAP1	51271	down	-2.55	-1.64
WDR47	22911	down	-2.55	-1.67
JOSD1	9929	down	-2.54	-1.65
CRMP1	1400	down	-2.54	-1.69
TBC1D25	4943	down	-2.54	-1.7
CDKN2D	1032	down	-2.54	-1.69
RPL5	6125	down	-2.54	-1.61
COL8A1	1295	down	-2.53	-1.66
KEAP1	9817	down	-2.53	-1.65
LOC652815	652815	down	-2.53	-1.68
PMS2L4	5382	down	-2.53	-1.64
PLA2G15	23659	down	-2.53	-1.66
LOC100128689	100128689	down	-2.53	-1.64
HIST3H2A	92815	down	-2.52	-1.65
RTN4	57142	down	-2.52	-1.61
TNFRSF10B	8795	down	-2.52	-1.63
PPIF	10105	down	-2.52	-1.67
C14orf78	113146	down	-2.52	-1.63
TNFAIP8L3	388121	down	-2.52	-1.66
HOOK2	29911	down	-2.51	-1.66
RPL13	6137	down	-2.51	-1.63
CKLF	51192	down	-2.51	-1.61
FBLN1	2192	down	-2.51	-1.62
CDA	978	down	-2.51	-1.62
MBOAT1	154141	down	-2.51	-1.67
RAB34	83871	down	-2.51	-1.64
ATP6V0E2	155066	down	-2.51	-1.65
HSPA6	3310	down	-2.5	-1.66
MGLL	11343	down	-2.5	-1.65
ARCN1	372	down	-2.5	-1.62
FAT1	2195	down	-2.5	-1.62
STX10	8677	down	-2.5	-1.63
GPSM1	26086	down	-2.5	-1.63
MAP3K4	4216	down	-2.5	-1.64
ADRB2	154	down	-2.5	-1.64
IER3	8870	down	-2.49	-1.59
BAPX1	579	down	-2.49	-1.68
BOK	666	down	-2.49	-1.66
C21orf63	59271	down	-2.49	-1.65
SURF4	6836	down	-2.49	-1.6
HERPUD1	9709	down	-2.49	-1.64
KBTBD9	114818	down	-2.49	-1.66
FZD9	8326	down	-2.49	-1.67
PXDN	7837	down	-2.49	-1.61
SPANXE	171489	down	-2.48	-1.65
PDDC1	347862	down	-2.48	-1.66
USP21	27005	down	-2.48	-1.65
LOC652846	652846	down	-2.48	-1.66
RBM24	221662	down	-2.48	-1.65
CNFN	84518	down	-2.48	-1.68
KLHL21	9903	down	-2.47	-1.64
RNASEH1	246243	down	-2.47	-1.62
FVT1	2531	down	-2.47	-1.61
SLC1A1	6505	down	-2.47	-1.67
CBR3	874	down	-2.47	-1.65
SOLH	6650	down	-2.47	-1.65
SRRM1	10250	down	-2.47	-1.62
GDE1	51573	down	-2.47	-1.65
LOC283267	283267	down	-2.47	-1.64
FBXO32	114907	down	-2.46	-1.64
PDE5A	8654	down	-2.46	-1.65
CAPG	822	down	-2.46	-1.63
TMED5	50999	down	-2.46	-1.63
CLK3	1198	down	-2.46	-1.63
TEX261	113419	down	-2.46	-1.65
WDR34	89891	down	-2.46	-1.63
PHF15	23338	down	-2.46	-1.64
UBE2N	7334	down	-2.45	-1.63
ARF5	381	down	-2.45	-1.6
SERINC2	347735	down	-2.45	-1.64
LIG1	3978	down	-2.45	-1.62
FLNB	2317	down	-2.45	-1.58
ARAP3	64411	down	-2.45	-1.63
CHPT1	56994	down	-2.44	-1.63
OLFM1	10439	down	-2.44	-1.62
F11R	50848	down	-2.44	-1.66
KIFC2	90990	down	-2.44	-1.66
BGN	633	down	-2.44	-1.63
PICALM	8301	down	-2.44	-1.61
ABR	29	down	-2.44	-1.61
C19orf52	90580	down	-2.44	-1.64
PANK1	53354	down	-2.44	-1.65
BCL2L1	598	down	-2.44	-1.58
KIAA1618	57714	down	-2.44	-1.65
C14orf159	80017	down	-2.43	-1.64
CPM	1368	down	-2.43	-1.66
CARKD	55739	down	-2.43	-1.61
C16orf93	90835	down	-2.43	-1.63
PPAP2C	8612	down	-2.43	-1.62
ZDHHC18	84243	down	-2.43	-1.63
MTMR9	66036	down	-2.43	-1.65
C2orf18	54978	down	-2.43	-1.63
NPIP	9284	down	-2.42	-1.64
ENDOD1	23052	down	-2.42	-1.66
VAV2	7410	down	-2.42	-1.63
YIF1A	10897	down	-2.42	-1.58
GPT2	84706	down	-2.42	-1.62
PLXNB2	23654	down	-2.41	-1.61
DSC3	1825	down	-2.41	-1.64
KIAA1602	57701	down	-2.41	-1.58
AP1M1	8907	down	-2.41	-1.59
FSTL1	11167	down	-2.41	-1.59
KRT17	3872	down	-2.41	-1.57
PHKA1	5255	down	-2.41	-1.63
AGPAT1	10554	down	-2.41	-1.65
RAVER1	125950	down	-2.41	-1.62
C10orf47	254427	down	-2.4	-1.64
SPOP	8405	down	-2.4	-1.59
ICAM2	3384	down	-2.4	-1.64
FLJ20489	55652	down	-2.39	-1.62
C20orf117	140710	down	-2.39	-1.63
PTPRF	5792	down	-2.39	-1.57
FZD1	8321	down	-2.39	-1.64
LOC643272	643272	down	-2.39	-1.62
UBR4	23352	down	-2.39	-1.59
PTPRM	5797	down	-2.39	-1.61
OAT	4942	down	-2.39	-1.59
UBE2Q2	92912	down	-2.39	-1.61
ZBTB47	92999	down	-2.39	-1.64
KCNG1	3755	down	-2.38	-1.62
TLCD1	116238	down	-2.38	-1.63
NFKB2	4791	down	-2.38	-1.6
NPDC1	56654	down	-2.38	-1.61
SLC43A3	29015	down	-2.38	-1.61
ABHD6	57406	down	-2.38	-1.62
CDK5R1	8851	down	-2.38	-1.63
RP11-529I10.4	25911	down	-2.38	-1.6
GINS2	51659	down	-2.38	-1.59
ATP2B4	493	down	-2.38	-1.59
CAP1	10487	down	-2.37	-1.55
CGNL1	84952	down	-2.37	-1.62
ADD1	118	down	-2.37	-1.61
FZD7	8324	down	-2.37	-1.63
DGKA	1606	down	-2.37	-1.64
PLCE1	51196	down	-2.37	-1.63
CSRP1	1465	down	-2.37	-1.56
ARF1	375	down	-2.36	-1.6
NEURL4	84461	down	-2.36	-1.61
LOC400506	400506	down	-2.36	-1.59
FAM109B	150368	down	-2.36	-1.63
KLHL12	59349	down	-2.36	-1.61
MANEAL	149175	down	-2.35	-1.61
HYAL3	8372	down	-2.35	-1.6
ZCCHC14	23174	down	-2.35	-1.59
ZNF574	64763	down	-2.35	-1.63
NFE2L3	9603	down	-2.35	-1.62
ATRN	8455	down	-2.35	-1.62
MOV10	4343	down	-2.35	-1.6
NKIRAS2	28511	down	-2.35	-1.6
PNPLA2	57104	down	-2.34	-1.61
NHEDC2	133308	down	-2.34	-1.62
KANK4	163782	down	-2.34	-1.61
C14orf145	145508	down	-2.34	-1.62
SIN3B	23309	down	-2.34	-1.59
INTS5	80789	down	-2.34	-1.59
HDGF	3068	down	-2.34	-1.56
SLC25A37	51312	down	-2.34	-1.59
C1orf41	51668	down	-2.34	-1.57
TBC1D14	57533	down	-2.34	-1.59
INA	9118	down	-2.33	-1.59
BTBD10	84280	down	-2.33	-1.58
DRAM1	55332	down	-2.33	-1.59
NUP214	8021	down	-2.33	-1.59
LOC100132535	100132535	down	-2.33	-1.62
C1orf198	84886	down	-2.32	-1.6
UBE1	7317	down	-2.32	-1.55
FOXK2	3607	down	-2.32	-1.62
DAG1	1605	down	-2.32	-1.58
UCKL1	54963	down	-2.32	-1.56
KLRAQ1	129285	down	-2.32	-1.61
NPAL3	57185	down	-2.32	-1.6
KIAA1310	55683	down	-2.32	-1.58
MED26	9441	down	-2.32	-1.6
CASZ1	54897	down	-2.31	-1.61
MAP1LC3A	84557	down	-2.31	-1.59
C16orf56	80152	down	-2.31	-1.58
JDP2	122953	down	-2.3	-1.6
OTUB1	55611	down	-2.3	-1.51
CCNI	10983	down	-2.3	-1.54
NUDT1	4521	down	-2.3	-1.58
TRIM8	81603	down	-2.3	-1.58
RPS6KA3	6197	down	-2.29	-1.59
MED8	112950	down	-2.29	-1.57
BMP2	650	down	-2.29	-1.58
TESK1	7016	down	-2.29	-1.59
DAPK1	1612	down	-2.29	-1.59
SLC4A2	6522	down	-2.28	-1.56
SLC45A3	85414	down	-2.28	-1.58
FAM102A	399665	down	-2.28	-1.57
ADCY6	112	down	-2.28	-1.59
ZCCHC17	51538	down	-2.28	-1.57
DUSP18	150290	down	-2.28	-1.6
NCRNA00094	266655	down	-2.28	-1.58
OLFML2A	169611	down	-2.28	-1.57
NBL1	4681	down	-2.28	-1.56
RNASEH2C	84153	down	-2.28	-1.59
PSME1	5720	down	-2.27	-1.54
NARF	26502	down	-2.27	-1.57
LOC730235	730235	down	-2.27	-1.59
OSBPL7	114881	down	-2.26	-1.55
TNRC6A	27327	down	-2.26	-1.57
CLDN23	137075	down	-2.26	-1.59
TJP2	9414	down	-2.26	-1.58
SLC38A5	92745	down	-2.26	-1.55
ARHGEF18	23370	down	-2.26	-1.53
HEXA	3073	down	-2.26	-1.57
SLC22A5	6584	down	-2.26	-1.58
BCL2	596	down	-2.25	-1.6
WIPI1	55062	down	-2.25	-1.58
LOC645937	645937	down	-2.25	-1.6
SORBS3	10174	down	-2.25	-1.57
LOC731314	731314	down	-2.25	-1.56
PAFAH1B1	5048	down	-2.25	-1.55
CORO1C	23603	down	-2.25	-1.54
LHX6	26468	down	-2.25	-1.59
COL6A1	1291	down	-2.25	-1.6
ULK1	8408	down	-2.24	-1.54
PDRG1	81572	down	-2.24	-1.55
IGHMBP2	3508	down	-2.24	-1.58
UNC84B	25777	down	-2.24	-1.53
HIVEP1	3096	down	-2.24	-1.58
PPT2	9374	down	-2.24	-1.57
LOC100130506	100130506	down	-2.24	-1.58
COPG	22820	down	-2.24	-1.55
SLC25A29	123096	down	-2.24	-1.59
CECR5	27440	down	-2.23	-1.57
CAV2	858	down	-2.23	-1.53
TNFAIP3	7128	down	-2.23	-1.58
CANT1	124583	down	-2.23	-1.54
GCGR	2642	down	-2.23	-1.59
MOBKL3	25843	down	-2.23	-1.57
SOCS2	8835	down	-2.22	-1.57
IGSF3	3321	down	-2.22	-1.57
CORO7	79585	down	-2.22	-1.57
WDR62	284403	down	-2.22	-1.58
MGC61598	441478	down	-2.22	-1.58
RRAS	6237	down	-2.22	-1.54
AP2A2	161	down	-2.22	-1.58
STK36	27148	down	-2.22	-1.54
IGFN1	91156	down	-2.22	-1.59
SEC13	6396	down	-2.21	-1.54
PSMD4	5710	down	-2.21	-1.52
DAP	1611	down	-2.21	-1.54
SLC25A44	9673	down	-2.21	-1.55
SIK1	150094	down	-2.2	-1.53
AGBL5	60509	down	-2.2	-1.54
RHOC	389	down	-2.2	-1.5
C12orf4	57102	down	-2.2	-1.56
STIM1	6786	down	-2.19	-1.57
MTF1	4520	down	-2.19	-1.55
FAM193A	8603	down	-2.19	-1.56
CTSA	5476	down	-2.19	-1.55
SLC26A11	284129	down	-2.19	-1.57
SGK1	6446	down	-2.18	-1.51
KIAA1467	57613	down	-2.18	-1.56
CERK	64781	down	-2.18	-1.52
UBE2D3	7323	down	-2.18	-1.53
CD276	80381	down	-2.18	-1.52
FJX1	24147	down	-2.18	-1.53
ARL4A	10124	down	-2.18	-1.56
CYTSA	23384	down	-2.18	-1.56
LOC200030	200030	down	-2.17	-1.52
ASB6	140459	down	-2.17	-1.55
KCTD15	79047	down	-2.17	-1.57
CCBL1	883	down	-2.17	-1.55
RGS12	6002	down	-2.17	-1.57
TSPAN3	10099	down	-2.17	-1.5
ODZ3	55714	down	-2.17	-1.57
NUP62CL	54830	down	-2.17	-1.55
WDR33	55339	down	-2.16	-1.56
MYH9	4627	down	-2.16	-1.49
PGM1	5236	down	-2.16	-1.51
ARL6IP1	23204	down	-2.16	-1.5
LOC399748	399748	down	-2.16	-1.5
KBTBD11	9920	down	-2.16	-1.55
PHPT1	29085	down	-2.16	-1.5
GTF2H4	2968	down	-2.15	-1.55
LOC100133673	100133673	down	-2.15	-1.57
KIF24	347240	down	-2.15	-1.56
TNIP1	10318	down	-2.15	-1.53
NPR2	4882	down	-2.15	-1.56
SAPS3	55291	down	-2.15	-1.53
IL17RC	84818	down	-2.15	-1.56
FGFRL1	53834	down	-2.15	-1.54
DCBLD2	131566	down	-2.15	-1.52
TMEM104	54868	down	-2.15	-1.55
CDC2L5	8621	down	-2.15	-1.55
ZNF598	90850	down	-2.14	-1.54
COQ10A	93058	down	-2.14	-1.55
SHKBP1	92799	down	-2.14	-1.55
INF2	64423	down	-2.14	-1.53
STK10	6793	down	-2.14	-1.55
PLAU	5328	down	-2.14	-1.52
C1orf122	127687	down	-2.14	-1.54
RAC1	5879	down	-2.14	-1.54
VIM	7431	down	-2.14	-1.48
SLC12A4	6560	down	-2.14	-1.52
ATF5	22809	down	-2.13	-1.53
C7orf41	222166	down	-2.13	-1.54
HLA-H	3136	down	-2.13	-1.52
PPARD	5467	down	-2.13	-1.56
SHMT1	6470	down	-2.13	-1.52
DEF8	54849	down	-2.13	-1.52
PRKCH	5583	down	-2.13	-1.54
UBE2C	11065	down	-2.13	-1.49
PNKD	25953	down	-2.13	-1.56
CDKN1C	1028	down	-2.13	-1.52
CFDP1	10428	down	-2.13	-1.52
LAMC3	10319	down	-2.13	-1.54
PLEKHB2	55041	down	-2.12	-1.5
STX3	6809	down	-2.12	-1.51
TICAM1	148022	down	-2.12	-1.56
MTMR11	10903	down	-2.12	-1.54
FBXO7	25793	down	-2.12	-1.54
SULT1A1	6817	down	-2.12	-1.55
LOC728138	728138	down	-2.12	-1.51
ARAP1	116985	down	-2.12	-1.54
NEDD9	4739	down	-2.11	-1.54
CTSL2	1515	down	-2.11	-1.54
ZHX1	11244	down	-2.11	-1.56
LOC648390	648390	down	-2.11	-1.48
KIAA2013	90231	down	-2.11	-1.52
GK	2710	down	-2.11	-1.54
CDC42BPB	9578	down	-2.11	-1.53
MGC3032	65998	down	-2.11	-1.53
MED15	51586	down	-2.11	-1.54
GJC2	57165	down	-2.11	-1.54
DCUN1D2	55208	down	-2.11	-1.55
SP8	221833	down	-2.11	-1.55
FAM89B	23625	down	-2.1	-1.52
TRAF2	7186	down	-2.1	-1.54
PEX6	5190	down	-2.1	-1.54
KRT86	3892	down	-2.1	-1.54
HLA-A29.1	649853	down	-2.1	-1.51
ERC1	23085	down	-2.1	-1.53
TH1L	51497	down	-2.1	-1.49
SLC25A23	79085	down	-2.1	-1.5
PDLIM3	27295	down	-2.1	-1.54
GNPDA2	132789	down	-2.1	-1.53
CKAP2	26586	down	-2.09	-1.52
C18orf25	147339	down	-2.09	-1.51
C10orf2	56652	down	-2.09	-1.51
PRNP	5621	down	-2.09	-1.5
FBXW11	23291	down	-2.09	-1.51
MEF2D	4209	down	-2.09	-1.51
RBM15B	29890	down	-2.09	-1.53
SLC38A10	124565	down	-2.09	-1.54
SLC25A4	291	down	-2.09	-1.5
MCOLN1	57192	down	-2.09	-1.51
FRMD3	257019	down	-2.09	-1.54
IKBKB	3551	down	-2.08	-1.52
C18orf54	162681	down	-2.08	-1.54
C3orf21	152002	down	-2.08	-1.51
FAM136A	84908	down	-2.08	-1.5
LOC728014	728014	down	-2.08	-1.52
GDA	9615	down	-2.08	-1.54
CHMP4A	29082	down	-2.08	-1.5
IL1RAPL1	11141	down	-2.08	-1.54
RAC3	5881	down	-2.08	-1.53
CSNK1E	1454	down	-2.08	-1.5
JPH2	57158	down	-2.08	-1.55
SMARCC2	6601	down	-2.08	-1.54
LOC440341	440341	down	-2.08	-1.51
BTG2	7832	down	-2.07	-1.53
S100A16	140576	down	-2.07	-1.46
NEFH	4744	down	-2.07	-1.5
DCPS	28960	down	-2.07	-1.52
TUBB4Q	56604	down	-2.07	-1.5
OSBPL5	114879	down	-2.07	-1.53
TAGLN2	8407	down	-2.07	-1.49
DSC2	1824	down	-2.07	-1.53
COL18A1	80781	down	-2.07	-1.53
ESPL1	9700	down	-2.07	-1.53
NSMAF	8439	down	-2.07	-1.51
MED27	9442	down	-2.07	-1.51
H1FX	8971	down	-2.07	-1.51
ADCK2	90956	down	-2.06	-1.52
EIF4A1	1973	down	-2.06	-1.48
SCD5	79966	down	-2.06	-1.53
FLJ10081	55683	down	-2.06	-1.51
PRRX2	51450	down	-2.06	-1.51
FBLN5	10516	down	-2.06	-1.52
MSN	4478	down	-2.06	-1.46
EIF2AK3	9451	down	-2.06	-1.53
CAMSAP1	157922	down	-2.05	-1.51
ELF3	1999	down	-2.05	-1.52
FERMT2	10979	down	-2.05	-1.47
DCLK1	9201	down	-2.05	-1.53
ZNF219	51222	down	-2.05	-1.52
ARL6IP6	151188	down	-2.05	-1.51
PTMS	5763	down	-2.05	-1.49
GLIPR2	152007	down	-2.05	-1.49
CSTF3	1479	down	-2.04	-1.53
ITGA3	3675	down	-2.04	-1.48
PRDM4	11108	down	-2.04	-1.5
MACROD1	28992	down	-2.04	-1.52
GPR64	10149	down	-2.04	-1.53
SPANXC	64663	down	-2.04	-1.52
PIGG	54872	down	-2.04	-1.5
TMEM97	27346	down	-2.04	-1.5
PAK4	10298	down	-2.04	-1.51
TCEA2	6919	down	-2.04	-1.51
LRRC8C	84230	down	-2.04	-1.51
RAB2B	84932	down	-2.04	-1.5
ZNF324	25799	down	-2.04	-1.52
CDC42EP4	23580	down	-2.03	-1.48
VPS8	23355	down	-2.03	-1.51
LOC654260	654260	down	-2.03	-1.52
SOD2	6648	down	-2.03	-1.51
CMTM3	123920	down	-2.03	-1.48
TRIM28	10155	down	-2.03	-1.47
OGDH	4967	down	-2.03	-1.49
HPSE	10855	down	-2.03	-1.54
GAB2	9846	down	-2.03	-1.51
SELS	55829	down	-2.03	-1.48
PPP2R2B	5521	down	-2.03	-1.52
ZFYVE27	118813	down	-2.03	-1.51
KIAA0460	23248	down	-2.03	-1.52
LMTK3	114783	down	-2.03	-1.53
LASS2	29956	down	-2.02	-1.47
DYRK3	8444	down	-2.02	-1.52
ZNF365	22891	down	-2.02	-1.51
TTC13	79573	down	-2.02	-1.5
CXCL2	2920	down	-2.02	-1.53
LOC653879	653879	down	-2.02	-1.5
NFATC2IP	84901	down	-2.02	-1.48
AURKB	9212	down	-2.02	-1.48
DDX28	55794	down	-2.01	-1.5
ASPHD1	253982	down	-2.01	-1.51
PISD	23761	down	-2.01	-1.49
C19orf6	91304	down	-2.01	-1.46
LOC100130332	100130332	down	-2.01	-1.51
MTP18	51537	down	-2.01	-1.5
LRRC59	55379	down	-2.01	-1.51
MCM3	4172	down	-2.01	-1.48
AGRN	375790	down	-2.01	-1.48
ATF4	468	down	-2.01	-1.49
DHRS1	115817	down	-2	-1.49
ITPRIP	85450	down	-2	-1.48
MYO9B	4650	down	-2	-1.5
LOC100134134	100134134	down	-2	-1.44
NASP	4678	down	-2	-1.5
SPANXA1	30014	down	-2	-1.5
LOC730323	730323	down	-2	-1.49
IRF2BP1	26145	down	-2	-1.52
TAOK2	9344	down	-2	-1.48
SLC2A6	11182	down	-2	-1.5
RABAC1	10567	down	-2	-1.48
APCDD1L	164284	down	-1.99	-1.5
POP7	10248	down	-1.99	-1.48
CDR2L	30850	down	-1.99	-1.46
PPL	5493	down	-1.99	-1.51
TULP3	7289	down	-1.99	-1.5
LOC391692	391692	down	-1.99	-1.52
GTF2E2	2961	down	-1.98	-1.46
MATN3	4148	down	-1.98	-1.51
TPT1	7178	down	-1.98	-1.44
GIT1	28964	down	-1.98	-1.51
FAM53C	51307	down	-1.98	-1.46
FURIN	5045	down	-1.98	-1.47
MATN2	4147	down	-1.98	-1.5
ZNF473	25888	down	-1.98	-1.51
ATP13A2	23400	down	-1.98	-1.5
KIFC1	3833	down	-1.98	-1.49
ITM2C	81618	down	-1.97	-1.47
ZNRF3	84133	down	-1.97	-1.5
PRMT2	3275	down	-1.97	-1.48
NUAK1	9891	down	-1.97	-1.45
PODXL	5420	down	-1.97	-1.44
LOC442597	442597	down	-1.97	-1.5
RP2	6102	down	-1.97	-1.47
LGALS3BP	3959	down	-1.97	-1.46
RHBDD2	57414	down	-1.97	-1.48
UAP1L1	91373	down	-1.97	-1.46
NYNRIN	57523	down	-1.97	-1.5
IFFO1	25900	down	-1.97	-1.5
TMEM205	374882	down	-1.97	-1.46
ZNF768	79724	down	-1.96	-1.48
TMEM136	219902	down	-1.96	-1.49
SLC41A2	84102	down	-1.96	-1.51
FLJ20699	55020	down	-1.96	-1.48
DHDDS	79947	down	-1.96	-1.48
SLC25A26	115286	down	-1.96	-1.51
TBC1D20	128637	down	-1.96	-1.5
LOC100133171	100133171	down	-1.96	-1.47
TEAD4	7004	down	-1.96	-1.5
LOC284023	284023	down	-1.96	-1.49
CTSZ	1522	down	-1.96	-1.5
ACYP2	98	down	-1.96	-1.5
VLDLR	7436	down	-1.96	-1.5
SMYD2	56950	down	-1.96	-1.48
HIATL1	84641	down	-1.96	-1.48
C6orf48	50854	down	-1.96	-1.49
LPAR1	1902	down	-1.95	-1.5
TXNDC11	51061	down	-1.95	-1.49
ZDHHC16	84287	down	-1.95	-1.47
FZD6	8323	down	-1.95	-1.49
PTPRA	5786	down	-1.95	-1.49
KLF11	8462	down	-1.95	-1.5
LOC652683	652683	down	-1.95	-1.47
WNT3	7473	down	-1.95	-1.51
CRTC2	200186	down	-1.95	-1.47
ICMT	23463	down	-1.95	-1.44
C19orf43	79002	down	-1.95	-1.48
CTGLF7	728127	down	-1.94	-1.47
EIF3H	8667	down	-1.94	-1.44
CTSF	8722	down	-1.94	-1.49
PLEKHG3	26030	down	-1.94	-1.48
C11orf75	56935	down	-1.94	-1.47
TIGD5	84948	down	-1.94	-1.46
FXR2	9513	down	-1.94	-1.47
FLNA	2316	down	-1.94	-1.45
SETD4	54093	down	-1.94	-1.48
METRNL	284207	down	-1.93	-1.47
MDP1	145553	down	-1.93	-1.48
SCARA3	51435	down	-1.93	-1.49
AGFG2	3268	down	-1.93	-1.49
FBXO2	26232	down	-1.93	-1.48
TTC32	130502	down	-1.93	-1.49
SLC22A4	6583	down	-1.93	-1.47
SDCCAG3	10807	down	-1.93	-1.46
VPS24	51652	down	-1.93	-1.48
COMTD1	118881	down	-1.93	-1.48
DENND1A	57706	down	-1.92	-1.47
TMCO3	55002	down	-1.92	-1.46
C9orf75	286262	down	-1.92	-1.49
PSRC1	84722	down	-1.92	-1.5
TPST2	8459	down	-1.92	-1.46
ZNF707	286075	down	-1.92	-1.48
LMAN2	10960	down	-1.92	-1.48
DEM1	64789	down	-1.92	-1.47
BAZ1B	9031	down	-1.92	-1.46
C10orf76	79591	down	-1.92	-1.49
CERCAM	51148	down	-1.92	-1.49
KCTD5	54442	down	-1.92	-1.45
LDLRAP1	26119	down	-1.91	-1.49
GALR2	8811	down	-1.91	-1.49
B4GALT5	9334	down	-1.91	-1.45
ABCC3	8714	down	-1.91	-1.45
RPS29	6235	down	-1.91	-1.48
PPP1R16A	84988	down	-1.91	-1.46
WDR45	11152	down	-1.91	-1.47
USP39	10713	down	-1.91	-1.45
NAT14	57106	down	-1.91	-1.47
LOC729764	729764	down	-1.91	-1.49
CBARA1	10367	down	-1.9	-1.47
SENP5	205564	down	-1.9	-1.48
CD68	968	down	-1.9	-1.47
SNX19	399979	down	-1.9	-1.48
B3GALTL	145173	down	-1.9	-1.47
LAMP3	27074	down	-1.9	-1.5
CCDC85A	114800	down	-1.9	-1.49
ITGB5	3693	down	-1.9	-1.45
GRB10	2887	down	-1.9	-1.46
UBA1	7317	down	-1.9	-1.42
ODF2	4957	down	-1.89	-1.49
RBM4B	83759	down	-1.89	-1.46
EDEM1	9695	down	-1.89	-1.45
LRIG1	26018	down	-1.89	-1.46
UBQLN4	56893	down	-1.89	-1.44
ARHGAP23	57636	down	-1.89	-1.44
ANKFY1	51479	down	-1.89	-1.44
LOC648980	648980	down	-1.89	-1.46
SEMA4D	10507	down	-1.89	-1.49
ACOT1	641371	down	-1.89	-1.46
PKIA	5569	down	-1.89	-1.49
GFOD1	54438	down	-1.89	-1.46
PDCD6IP	10015	down	-1.89	-1.48
WDR51A	25886	down	-1.89	-1.45
MTCH2	23788	down	-1.89	-1.47
CNNM3	26505	down	-1.89	-1.48
VPS18	57617	down	-1.89	-1.45
ADAMTS6	11174	down	-1.88	-1.47
HIST2H2AB	317772	down	-1.88	-1.49
DERL1	79139	down	-1.88	-1.44
SULT1A4	445329	down	-1.88	-1.46
ACPL2	92370	down	-1.88	-1.48
LTBP4	8425	down	-1.88	-1.48
NRBP2	340371	down	-1.88	-1.45
ZDHHC3	51304	down	-1.88	-1.46
DYRK2	8445	down	-1.88	-1.45
GADD45A	1647	down	-1.88	-1.45
EDC4	23644	down	-1.88	-1.45
CTNS	1497	down	-1.88	-1.48
LAMB2	3913	down	-1.88	-1.47
TNFRSF10D	8793	down	-1.88	-1.44
LOC642956	642956	down	-1.88	-1.42
RNF38	152006	down	-1.87	-1.47
PID1	55022	down	-1.87	-1.45
PIK3R2	5296	down	-1.87	-1.42
PHGDH	26227	down	-1.87	-1.41
STRN4	29888	down	-1.87	-1.46
ZHX2	22882	down	-1.87	-1.47
POMT2	29954	down	-1.87	-1.46
LOC649679	649679	down	-1.87	-1.45
RBM6	10180	down	-1.87	-1.46
SFRS15	57466	down	-1.87	-1.45
FLJ42627	645644	down	-1.86	-1.44
LOC653506	653506	down	-1.86	-1.43
PLP2	5355	down	-1.86	-1.44
C9orf116	138162	down	-1.86	-1.46
GSG2	83903	down	-1.86	-1.48
C9orf125	84302	down	-1.86	-1.46
KIAA0649	9858	down	-1.86	-1.46
CTSB	1508	down	-1.86	-1.44
MYO1E	4643	down	-1.86	-1.47
DPP7	29952	down	-1.86	-1.45
ATP5S	27109	down	-1.86	-1.47
PI4KAP2	375133	down	-1.85	-1.46
SMOC1	64093	down	-1.85	-1.44
AK2	204	down	-1.85	-1.42
PTP4A2	8073	down	-1.85	-1.41
SETD8	387893	down	-1.85	-1.43
TRAF4	9618	down	-1.85	-1.47
PHKG2	5261	down	-1.85	-1.47
LOC391578	391578	down	-1.85	-1.46
FAM54A	113115	down	-1.85	-1.45
ATP6V0A2	23545	down	-1.85	-1.46
HMGXB4	10042	down	-1.85	-1.45
TMEM185B	79134	down	-1.85	-1.47
HTRA1	5654	down	-1.85	-1.42
FXYD5	53827	down	-1.85	-1.42
SELO	83642	down	-1.85	-1.46
IAH1	285148	down	-1.84	-1.44
CDCA5	113130	down	-1.84	-1.41
IMPA2	3613	down	-1.84	-1.42
TNFRSF19	55504	down	-1.84	-1.46
RHOB	388	down	-1.84	-1.41
KIF23	9493	down	-1.84	-1.43
CEBPG	1054	down	-1.84	-1.46
KIAA0082	23070	down	-1.84	-1.47
C16orf91	283951	down	-1.84	-1.44
COG1	9382	down	-1.84	-1.47
ANPEP	290	down	-1.84	-1.41
NFRKB	4798	down	-1.84	-1.46
TIMP2	7077	down	-1.84	-1.45
GOSR2	9570	down	-1.83	-1.47
FKBPL	63943	down	-1.83	-1.46
GRN	2896	down	-1.83	-1.42
CDK2AP2	10263	down	-1.83	-1.45
INTS1	26173	down	-1.83	-1.45
NDST1	3340	down	-1.83	-1.44
BCAR1	9564	down	-1.83	-1.44
SKP1	6500	down	-1.83	-1.44
DYNLL2	140735	down	-1.83	-1.45
PBK	55872	down	-1.83	-1.44
GABPB1	2553	down	-1.83	-1.45
C1orf93	127281	down	-1.83	-1.46
GPI	2821	down	-1.83	-1.42
TRIM37	4591	down	-1.83	-1.44
KIAA0406	9675	down	-1.83	-1.45
PCNXL3	399909	down	-1.83	-1.43
ADAL	161823	down	-1.83	-1.47
GNAS	2778	down	-1.83	-1.39
LARP4B	23185	down	-1.83	-1.43
CST3	1471	down	-1.83	-1.43
ARL16	339231	down	-1.83	-1.45
SLCO3A1	28232	down	-1.82	-1.47
LTBP2	4053	down	-1.82	-1.44
B3GALT6	126792	down	-1.82	-1.44
LOC730074	730074	down	-1.82	-1.44
C20orf3	57136	down	-1.82	-1.42
GAMT	2593	down	-1.82	-1.45
ZDHHC12	84885	down	-1.82	-1.45
PYCR1	5831	down	-1.82	-1.45
ARNTL	406	down	-1.82	-1.45
C10orf75	90271	down	-1.82	-1.45
ECOP	81552	down	-1.82	-1.44
CTTN	2017	down	-1.81	-1.41
ARPC1B	10095	down	-1.81	-1.44
MANBAL	63905	down	-1.81	-1.42
SLC43A2	124935	down	-1.81	-1.46
BRP44L	51660	down	-1.81	-1.44
GNPTAB	79158	down	-1.81	-1.42
QSOX2	169714	down	-1.81	-1.43
ZSWIM4	65249	down	-1.81	-1.46
CYB5R3	1727	down	-1.81	-1.43
AKR1B1	231	down	-1.81	-1.38
CASP2	835	down	-1.81	-1.45
MPDU1	9526	down	-1.81	-1.43
CCDC128	129285	down	-1.81	-1.45
TMEM217	221468	down	-1.81	-1.45
FAM109A	144717	down	-1.81	-1.46
ZMIZ2	83637	down	-1.81	-1.45
PRKCZ	5590	down	-1.8	-1.46
ENDOG	2021	down	-1.8	-1.42
IFT52	51098	down	-1.8	-1.44
C1QTNF1	114897	down	-1.8	-1.46
TBCB	1155	down	-1.8	-1.41
DNM2	1785	down	-1.8	-1.43
SPRY4	81848	down	-1.8	-1.44
MIF4GD	57409	down	-1.79	-1.46
C18orf8	29919	down	-1.79	-1.43
ERGIC3	51614	down	-1.79	-1.42
ST5	6764	down	-1.79	-1.42
TST	7263	down	-1.79	-1.41
BLVRA	644	down	-1.79	-1.42
F12	2161	down	-1.79	-1.46
PGBD5	79605	down	-1.79	-1.46
TWISTNB	221830	down	-1.79	-1.45
C1orf35	79169	down	-1.79	-1.43
CHRAC1	54108	down	-1.79	-1.44
FHL2	2274	down	-1.79	-1.4
C11orf24	53838	down	-1.79	-1.44
CENTG3	116988	down	-1.79	-1.43
TSPAN13	27075	down	-1.79	-1.44
AP1G2	8906	down	-1.79	-1.44
PAFAH1B3	5050	down	-1.78	-1.4
LOC647436	647436	down	-1.78	-1.42
MLL5	55904	down	-1.78	-1.45
CD46	4179	down	-1.78	-1.42
TMEM44	93109	down	-1.78	-1.44
DOLK	22845	down	-1.78	-1.42
OAF	220323	down	-1.78	-1.43
C19orf47	126526	down	-1.78	-1.45
LIMS2	55679	down	-1.78	-1.45
ARFGAP1	55738	down	-1.78	-1.41
SRP68	6730	down	-1.77	-1.41
SECISBP2L	9728	down	-1.77	-1.45
NRIP3	56675	down	-1.77	-1.44
GSDM1	284110	down	-1.77	-1.43
BAP1	8314	down	-1.77	-1.43
C6orf64	55776	down	-1.77	-1.45
JUP	3728	down	-1.77	-1.4
ATP6V0D1	9114	down	-1.77	-1.41
BAIAP2	10458	down	-1.77	-1.44
MCOLN3	55283	down	-1.77	-1.46
FAM50A	9130	down	-1.77	-1.39
LOC390671	390671	down	-1.77	-1.43
SMURF1	57154	down	-1.77	-1.45
TCP11L1	55346	down	-1.76	-1.43
ATL3	25923	down	-1.76	-1.42
PKN1	5585	down	-1.76	-1.44
CDR2	1039	down	-1.76	-1.41
EIF3L	51386	down	-1.76	-1.37
TXNRD2	10587	down	-1.76	-1.43
VPS39	23339	down	-1.76	-1.43
ACAA1	30	down	-1.76	-1.41
KCNK4	50801	down	-1.76	-1.45
LRRFIP2	9209	down	-1.76	-1.41
YIF1B	90522	down	-1.76	-1.44
AKAP10	11216	down	-1.76	-1.43
KPNA6	23633	down	-1.76	-1.4
UNC13D	201294	down	-1.76	-1.41
CKAP5	9793	down	-1.76	-1.4
CENTD2	116985	down	-1.76	-1.45
TCEAL3	85012	down	-1.76	-1.42
FAM127B	26071	down	-1.75	-1.43
MVP	9961	down	-1.75	-1.44
IDS	3423	down	-1.75	-1.43
KCTD2	23510	down	-1.75	-1.43
TAZ	6901	down	-1.75	-1.45
PSMB8	5696	down	-1.75	-1.43
TOP1MT	116447	down	-1.75	-1.41
HIST2H4B	554313	down	-1.75	-1.43
BRSK1	84446	down	-1.75	-1.44
ARFGAP3	26286	down	-1.75	-1.41
TIMM23	10431	down	-1.75	-1.41
WBSCR22	114049	down	-1.75	-1.39
AKAP11	11215	down	-1.75	-1.44
BSG	682	down	-1.74	-1.39
GSTO2	119391	down	-1.74	-1.42
PTPRR	5801	down	-1.74	-1.43
C10orf58	84293	down	-1.74	-1.42
SRPR	6734	down	-1.74	-1.42
ZDHHC13	54503	down	-1.74	-1.44
C10orf6	55719	down	-1.74	-1.43
C14orf169	79697	down	-1.74	-1.41
PDCD7	10081	down	-1.74	-1.42
RGS16	6004	down	-1.73	-1.44
PLIN2	123	down	-1.73	-1.43
TAGLN	6876	down	-1.73	-1.41
SLC36A1	206358	down	-1.73	-1.41
ZP3	7784	down	-1.73	-1.43
PPP1CA	5499	down	-1.73	-1.39
LOC729086	729086	down	-1.73	-1.4
SLIT2	9353	down	-1.73	-1.43
UBE2Z	65264	down	-1.73	-1.39
DOK7	285489	down	-1.73	-1.43
SUMF1	285362	down	-1.73	-1.41
NSFL1C	55968	down	-1.73	-1.42
MSRA	4482	down	-1.73	-1.42
UNC45A	55898	down	-1.73	-1.4
PRDX2	7001	down	-1.73	-1.38
STXBP2	6813	down	-1.73	-1.43
NME1-NME2	654364	down	-1.72	-1.4
SH3BP5L	80851	down	-1.72	-1.42
NARG1	80155	down	-1.72	-1.43
TANC1	85461	down	-1.72	-1.42
DERL2	51009	down	-1.72	-1.4
MAPK12	6300	down	-1.72	-1.42
IFI27L1	122509	down	-1.72	-1.4
LTBR	4055	down	-1.72	-1.38
TEAD2	8463	down	-1.72	-1.4
C17orf62	79415	down	-1.72	-1.42
BAZ1A	11177	down	-1.71	-1.43
HIF1AN	55662	down	-1.71	-1.42
NXN	64359	down	-1.71	-1.41
CORO2A	7464	down	-1.71	-1.43
PLEKHG4	25894	down	-1.71	-1.41
GOLSYN	55638	down	-1.71	-1.42
ATG16L1	55054	down	-1.71	-1.4
LOC440093	440093	down	-1.71	-1.37
PPP2R5D	5528	down	-1.71	-1.42
FKBP1A	2280	down	-1.71	-1.38
PARP3	10039	down	-1.71	-1.42
CRK	1398	down	-1.71	-1.38
ZNF384	171017	down	-1.71	-1.41
GRWD1	83743	down	-1.71	-1.39
LOC728457	728457	down	-1.71	-1.41
ARPC2	10109	down	-1.71	-1.44
GNA11	2767	down	-1.71	-1.41
FAM39DP	374666	down	-1.7	-1.4
C19orf29	58509	down	-1.7	-1.42
FUCA1	2517	down	-1.7	-1.42
C19orf28	126321	down	-1.7	-1.4
ZNHIT3	9326	down	-1.7	-1.37
DNLZ	728489	down	-1.7	-1.39
LOC220686	220686	down	-1.7	-1.43
DDX58	23586	down	-1.7	-1.43
PPAPDC1B	84513	down	-1.7	-1.42
UBAP2	55833	down	-1.7	-1.39
LHX2	9355	down	-1.7	-1.43
DENND4B	9909	down	-1.7	-1.39
PLOD1	5351	down	-1.7	-1.36
HIST1H4K	8362	down	-1.7	-1.41
C17orf96	100170841	down	-1.7	-1.42
RAB31	11031	down	-1.7	-1.38
KAL1	3730	down	-1.7	-1.42
DOK4	55715	down	-1.69	-1.42
LOC388122	388122	down	-1.69	-1.4
LIF	3976	down	-1.69	-1.41
SEMA4F	10505	down	-1.69	-1.42
MYST1	84148	down	-1.69	-1.42
MT1F	4494	down	-1.69	-1.43
KLHDC5	57542	down	-1.69	-1.4
TSC2	7249	down	-1.69	-1.41
SAP30BP	29115	down	-1.69	-1.42
TRIM25	7706	down	-1.69	-1.4
USP4	7375	down	-1.69	-1.41
EHBP1L1	254102	down	-1.69	-1.4
MBD1	4152	down	-1.68	-1.41
SLC48A1	55652	down	-1.68	-1.42
AQR	9716	down	-1.68	-1.4
DNAJC13	23317	down	-1.68	-1.42
IL20RB	53833	down	-1.68	-1.42
NAV3	89795	down	-1.68	-1.42
CASP9	842	down	-1.68	-1.4
EXOC3	11336	down	-1.68	-1.39
RBM42	79171	down	-1.68	-1.39
MRPS2	51116	down	-1.68	-1.38
SH2D3A	10045	down	-1.68	-1.42
C1orf123	54987	down	-1.68	-1.39
CLDN1	9076	down	-1.68	-1.39
LOC653930	653930	down	-1.68	-1.43
EEF1A2	1917	down	-1.68	-1.38
B4GALNT4	338707	down	-1.68	-1.42
ARRDC2	27106	down	-1.68	-1.41
PTPN23	25930	down	-1.68	-1.41
DAPK3	1613	down	-1.68	-1.42
MAPKBP1	23005	down	-1.67	-1.39
ING4	51147	down	-1.67	-1.42
ADAM15	8751	down	-1.67	-1.41
NOTCH3	4854	down	-1.67	-1.4
FSD1	79187	down	-1.67	-1.41
SH3PXD2A	9644	down	-1.67	-1.4
FAM13B	51306	down	-1.67	-1.4
S100A4	6275	down	-1.67	-1.34
KLK3	354	down	-1.67	-1.39
CTBP1	1487	down	-1.67	-1.41
IFT20	90410	down	-1.67	-1.4
C12orf56	115749	down	-1.67	-1.42
LOC645166	645166	down	-1.66	-1.39
RFNG	5986	down	-1.66	-1.4
PDCD4	27250	down	-1.66	-1.4
FOXC1	2296	down	-1.66	-1.38
MAP2K2	5605	down	-1.66	-1.37
XRCC1	7515	down	-1.66	-1.4
CNOT7	29883	down	-1.66	-1.39
FYN	2534	down	-1.66	-1.42
SCG5	6447	down	-1.66	-1.37
NFKBIE	4794	down	-1.66	-1.42
SFRS4	6429	down	-1.66	-1.37
PIGS	94005	down	-1.65	-1.39
NNT	23530	down	-1.65	-1.39
RAPH1	65059	down	-1.65	-1.41
ALDH18A1	5832	down	-1.65	-1.38
CCDC74B	91409	down	-1.65	-1.42
COX4NB	10328	down	-1.65	-1.39
C15orf44	81556	down	-1.65	-1.4
SERF1A	8293	down	-1.65	-1.4
SDC2	6383	down	-1.65	-1.4
KIAA0495	57212	down	-1.65	-1.39
NFE2L1	4779	down	-1.65	-1.39
CHPF	79586	down	-1.65	-1.4
FBN1	2200	down	-1.65	-1.41
SCCPDH	51097	down	-1.65	-1.4
CCNE2	9134	down	-1.65	-1.41
KDSR	2531	down	-1.65	-1.41
PRDX5	25824	down	-1.65	-1.34
ANTXR1	84168	down	-1.65	-1.39
PHLDB2	90102	down	-1.65	-1.4
RRP1B	23076	down	-1.65	-1.39
ENTPD6	955	down	-1.65	-1.37
TIMP1	7076	down	-1.65	-1.35
C4orf48	401115	down	-1.65	-1.4
PITPNB	23760	down	-1.64	-1.39
ROGDI	79641	down	-1.64	-1.42
PIK3CD	5293	down	-1.64	-1.42
COCH	1690	down	-1.64	-1.41
MRPL11	65003	down	-1.64	-1.36
MFN2	9927	down	-1.64	-1.38
SH3RF2	153769	down	-1.64	-1.39
SNTA1	6640	down	-1.64	-1.4
CD163L1	283316	down	-1.64	-1.4
AKR7A2	8574	down	-1.64	-1.36
TRIM7	81786	down	-1.64	-1.4
HUWE1	10075	down	-1.64	-1.4
IKBKE	9641	down	-1.63	-1.4
NIPSNAP3A	25934	down	-1.63	-1.37
VGF	7425	down	-1.63	-1.42
DAXX	1616	down	-1.63	-1.4
NDUFB2	4708	down	-1.63	-1.34
SERPINB6	5269	down	-1.63	-1.36
KIAA0913	23053	down	-1.63	-1.38
ZBTB3	79842	down	-1.63	-1.4
CPXM1	56265	down	-1.63	-1.39
TNRC15	26058	down	-1.63	-1.39
ZDHHC14	79683	down	-1.63	-1.39
LOC727752	727752	down	-1.63	-1.41
URG4	55665	down	-1.62	-1.39
RICS	9743	down	-1.62	-1.4
SAMD1	90378	down	-1.62	-1.41
ZCCHC3	85364	down	-1.62	-1.4
LOC285074	285074	down	-1.62	-1.39
RNF185	91445	down	-1.62	-1.4
MAP3K3	4215	down	-1.62	-1.4
LYPD6B	130576	down	-1.62	-1.39
AIF1	199	down	-1.62	-1.4
ARHGEF4	50649	down	-1.62	-1.39
DLL3	10683	down	-1.62	-1.4
DPP3	10072	down	-1.62	-1.39
PDXDC1	23042	down	-1.62	-1.36
LRP8	7804	down	-1.62	-1.38
BIRC3	330	down	-1.62	-1.4
HYOU1	10525	down	-1.62	-1.38
ANKRD36	375248	down	-1.62	-1.41
RPL13A	23521	down	-1.62	-1.34
SLC35F3	148641	down	-1.62	-1.4
CDK5RAP3	80279	down	-1.62	-1.38
SREBF1	6720	down	-1.62	-1.39
TLE3	7090	down	-1.62	-1.4
HLA-C	3107	down	-1.62	-1.4
APBB1IP	54518	down	-1.61	-1.4
WDR35	57539	down	-1.61	-1.4
CELSR2	1952	down	-1.61	-1.4
KIAA1539	80256	down	-1.61	-1.39
LOC729623	729623	down	-1.61	-1.41
LAMP1	3916	down	-1.61	-1.34
C17orf101	79701	down	-1.61	-1.4
CEP55	55165	down	-1.61	-1.38
PLEKHM1	9842	down	-1.61	-1.39
NOD1	10392	down	-1.61	-1.4
LIMS1	3987	down	-1.6	-1.38
SLC35B2	347734	down	-1.6	-1.36
RNH1	6050	down	-1.6	-1.37
SCPEP1	59342	down	-1.6	-1.37
LOC90120	90120	down	-1.6	-1.38
P4HB	5034	down	-1.6	-1.35
NENF	29937	down	-1.6	-1.35
YDJC	150223	down	-1.6	-1.38
PLEKHO2	80301	down	-1.6	-1.4
LAMC1	3915	down	-1.6	-1.34
GPX7	2882	down	-1.6	-1.4
C3	718	down	-1.6	-1.38
HLA-F	3134	down	-1.6	-1.4
HAX1	10456	down	-1.6	-1.39
PSEN1	5663	down	-1.6	-1.39
KIAA0652	9776	down	-1.6	-1.41
AGXT2L2	85007	down	-1.6	-1.4
CEP164	22897	down	-1.59	-1.39
NDST2	8509	down	-1.59	-1.4
EIF2C3	192669	down	-1.59	-1.4
LOC728888	728888	down	-1.59	-1.34
C3orf10	55845	down	-1.59	-1.37
CCNE1	898	down	-1.59	-1.38
SH3GL2	6456	down	-1.59	-1.39
INTS10	55174	down	-1.59	-1.36
TAP2	6891	down	-1.59	-1.39
STK19	8859	down	-1.59	-1.37
HIST1H2BC	8347	down	-1.59	-1.39
KLHL22	84861	down	-1.59	-1.38
AARS2	57505	down	-1.59	-1.38
TSPAN31	6302	down	-1.59	-1.39
NT5E	4907	down	-1.59	-1.35
DTX3	196403	down	-1.59	-1.4
TMEM222	84065	down	-1.59	-1.39
PRKX	5613	down	-1.59	-1.4
GABPB2	2553	down	-1.59	-1.36
LETM1	3954	down	-1.58	-1.39
PRKRIP1	79706	down	-1.58	-1.38
SERPINB8	5271	down	-1.58	-1.38
GNB2	2783	down	-1.58	-1.38
TRRAP	8295	down	-1.58	-1.35
RHOG	391	down	-1.58	-1.36
HIST1H3E	8353	down	-1.58	-1.4
TUB	7275	down	-1.58	-1.38
EHD2	30846	down	-1.58	-1.37
UBTF	7343	down	-1.58	-1.38
TSEN34	79042	down	-1.58	-1.37
NDUFA6	4700	down	-1.58	-1.37
NMU	10874	down	-1.58	-1.38
B3GAT3	26229	down	-1.58	-1.39
STAU2	27067	down	-1.58	-1.39
HERPUD2	64224	down	-1.57	-1.39
FLJ20254	54867	down	-1.57	-1.38
PHRF1	57661	down	-1.57	-1.36
IL24	11009	down	-1.57	-1.38
PLEKHG2	64857	down	-1.57	-1.38
MAP6D1	79929	down	-1.57	-1.38
NCOA5	57727	down	-1.57	-1.38
RHOBTB1	9886	down	-1.57	-1.39
CTDP1	9150	down	-1.57	-1.38
RNASEH2A	10535	down	-1.57	-1.36
TCF3	6929	down	-1.57	-1.36
PAF1	54623	down	-1.57	-1.37
PDF	64146	down	-1.57	-1.39
TSPAN14	81619	down	-1.57	-1.38
FLJ90086	389389	down	-1.57	-1.4
EIF2AK1	27102	down	-1.56	-1.34
GGA3	23163	down	-1.56	-1.39
VPS26A	9559	down	-1.56	-1.35
PLD6	201164	down	-1.56	-1.38
LETM2	137994	down	-1.56	-1.37
BRPF1	7862	down	-1.56	-1.37
EIF2S2	8894	down	-1.56	-1.38
SDHA	6389	down	-1.56	-1.34
RAB11FIP3	9727	down	-1.56	-1.37
OPN3	23596	down	-1.56	-1.39
LAT	27040	down	-1.56	-1.4
TRAP1	10131	down	-1.56	-1.35
PKN3	29941	down	-1.56	-1.37
LOC643031	643031	down	-1.56	-1.35
ARHGAP22	58504	down	-1.56	-1.39
HMGCS1	3157	down	-1.56	-1.34
MFGE8	4240	down	-1.56	-1.36
FAM160A2	84067	down	-1.56	-1.38
DLG5	9231	down	-1.56	-1.39
EFEMP1	2202	down	-1.56	-1.34
QRICH1	54870	down	-1.56	-1.35
MED24	9862	down	-1.56	-1.37
NBPF3	84224	down	-1.56	-1.38
MIER2	54531	down	-1.55	-1.38
LOC653583	653583	down	-1.55	-1.38
FAM24B	196792	down	-1.55	-1.39
SETD1A	9739	down	-1.55	-1.37
VEGFA	7422	down	-1.55	-1.37
GTF3C1	2975	down	-1.55	-1.34
STRADA	92335	down	-1.55	-1.4
KIAA0247	9766	down	-1.55	-1.39
DOCK5	80005	down	-1.55	-1.38
ELK3	2004	down	-1.55	-1.39
MYL5	4636	down	-1.55	-1.39
IPO9	55705	down	-1.55	-1.37
FAM168B	130074	down	-1.55	-1.36
CCDC101	112869	down	-1.55	-1.38
GSTK1	373156	down	-1.55	-1.35
SYVN1	84447	down	-1.55	-1.4
S100A13	6284	down	-1.55	-1.37
PSME2	5721	down	-1.55	-1.34
SNX30	401548	down	-1.54	-1.37
PRR4	11272	down	-1.54	-1.38
TP53BP2	7159	down	-1.54	-1.36
DUSP23	54935	down	-1.54	-1.33
SLFN12	55106	down	-1.54	-1.38
COMMD4	54939	down	-1.54	-1.34
M160	283316	down	-1.54	-1.38
OGFRL1	79627	down	-1.54	-1.37
FRAS1	80144	down	-1.54	-1.36
PPP2R3B	28227	down	-1.54	-1.38
ACYP1	97	down	-1.54	-1.36
ME3	10873	down	-1.54	-1.37
CROT	54677	down	-1.54	-1.38
FABP5	2171	down	-1.54	-1.33
VAMP2	6844	down	-1.54	-1.38
PYGB	5834	down	-1.54	-1.36
LARP6	55323	down	-1.54	-1.36
IL4R	3566	down	-1.54	-1.37
MCL1	4170	down	-1.54	-1.35
GRAMD4	23151	down	-1.54	-1.39
EPN2	22905	down	-1.54	-1.37
BMP2K	55589	down	-1.54	-1.37
TMEM134	80194	down	-1.54	-1.37
CLDN14	23562	down	-1.54	-1.37
CCDC104	112942	down	-1.54	-1.38
FAM105B	90268	down	-1.53	-1.34
PMS2L5	5383	down	-1.53	-1.38
INSIG2	51141	down	-1.53	-1.37
C22orf40	150383	down	-1.53	-1.37
PUSL1	126789	down	-1.53	-1.37
KRT34	3885	down	-1.53	-1.38
DNAJB2	3300	down	-1.53	-1.35
CARD10	29775	down	-1.53	-1.36
IL27RA	9466	down	-1.53	-1.37
RASSF7	8045	down	-1.53	-1.37
PTRF	284119	down	-1.53	-1.31
SPOCK1	6695	down	-1.53	-1.33
LOC644254	644254	down	-1.53	-1.38
SUOX	6821	down	-1.53	-1.37
RBM17	84991	down	-1.52	-1.36
FADD	8772	down	-1.52	-1.33
UPF1	5976	down	-1.52	-1.36
HIST1H2BE	8344	down	-1.52	-1.38
EFNA1	1942	down	-1.52	-1.37
RNU86	116936	down	-1.52	-1.39
EIF1	10209	down	-1.52	-1.32
KRT7	3855	down	-1.52	-1.32
UCA1	652995	down	-1.52	-1.36
SMAGP	57228	down	-1.52	-1.37
PIP3-E	26034	down	-1.52	-1.39
CHKA	1119	down	-1.52	-1.36
VKORC1	79001	down	-1.52	-1.39
C6orf108	10591	down	-1.52	-1.35
TRNAU1AP	54952	down	-1.51	-1.38
ACP1	52	down	-1.51	-1.34
CD81	975	down	-1.51	-1.31
ARHGAP17	55114	down	-1.51	-1.33
MYO9A	4649	down	-1.51	-1.36
LOC402221	402221	down	-1.51	-1.32
GLCE	26035	down	-1.51	-1.36
ARL2	402	down	-1.51	-1.32
RRBP1	6238	down	-1.51	-1.34
TSPO	706	down	-1.51	-1.33
ZNF500	26048	down	-1.51	-1.38
AKTIP	64400	down	-1.51	-1.38
CBY1	25776	down	-1.51	-1.35
GFPT2	9945	down	-1.51	-1.35
GTF2F1	2962	down	-1.51	-1.35
ATP6V0C	527	down	-1.5	-1.34
AKT1	207	down	-1.5	-1.34
MEX3C	51320	down	-1.5	-1.37
USP36	57602	down	-1.5	-1.36
PACSIN2	11252	down	-1.5	-1.33
EBF1	1879	up	1.5	1.31
ZNF616	90317	up	1.5	1.31
CLK1	1195	up	1.5	1.32
LAP3	51056	up	1.5	1.34
LOC389049	389049	up	1.5	1.32
PVRL3	25945	up	1.5	1.33
RAD21	5885	up	1.5	1.33
CCDC23	374969	up	1.5	1.34
SELT	51714	up	1.5	1.33
FNTA	2339	up	1.5	1.35
TP53I3	9540	up	1.51	1.34
HIP2	3093	up	1.51	1.35
C22orf30	253143	up	1.51	1.35
FAR2	55711	up	1.51	1.31
NAT12	122830	up	1.51	1.31
USMG5	84833	up	1.51	1.32
CTR9	9646	up	1.51	1.33
HIF1A	3091	up	1.51	1.34
NSUN2	54888	up	1.51	1.38
STK40	83931	up	1.51	1.36
HMGB1L1	10357	up	1.51	1.34
STK35	140901	up	1.51	1.33
ERLIN2	11160	up	1.51	1.32
WBP4	11193	up	1.51	1.33
MLF1	4291	up	1.51	1.31
VPS54	51542	up	1.51	1.33
BFAR	51283	up	1.51	1.35
LYST	1130	up	1.51	1.31
SNORD104	692227	up	1.51	1.33
ZBTB44	29068	up	1.51	1.31
ASCC3	10973	up	1.51	1.34
PTBP2	58155	up	1.51	1.31
IL18BP	10068	up	1.52	1.33
NHP2L1	4809	up	1.52	1.37
CCDC28B	79140	up	1.52	1.32
COPS5	10987	up	1.52	1.37
LOC646909	646909	up	1.52	1.32
P4HA1	5033	up	1.52	1.34
LRRC40	55631	up	1.52	1.33
FAM86A	196483	up	1.52	1.35
SNORD80	26774	up	1.52	1.34
YIPF4	84272	up	1.52	1.37
GGPS1	9453	up	1.53	1.35
LOC730004	730004	up	1.53	1.33
MAPKAP1	79109	up	1.53	1.33
LOC652773	652773	up	1.53	1.33
BCLAF1	9774	up	1.53	1.34
DSEL	92126	up	1.53	1.32
COL4A3BP	10087	up	1.53	1.33
RNF126	55658	up	1.53	1.34
RPL37	6167	up	1.53	1.34
EVI5	7813	up	1.53	1.33
RNF7	9616	up	1.53	1.38
MRPS9	64965	up	1.53	1.36
YWHAE	7531	up	1.53	1.3
SNORA24	677809	up	1.53	1.33
WRN	7486	up	1.53	1.33
MYO1B	4430	up	1.53	1.35
CLASP2	23122	up	1.53	1.34
C12orf35	55196	up	1.53	1.34
RNF216	54476	up	1.53	1.34
RBM4	5936	up	1.53	1.36
CCS	9973	up	1.54	1.31
UQCC	55245	up	1.54	1.32
LOC728782	728782	up	1.54	1.38
ALDH3A2	224	up	1.54	1.35
TTRAP	51567	up	1.54	1.33
SLC30A9	10463	up	1.54	1.34
MTX2	10651	up	1.54	1.35
LOC201725	201725	up	1.54	1.34
LOC728467	728467	up	1.54	1.32
LOC647346	647346	up	1.54	1.35
ZNF136	7695	up	1.54	1.33
VPS29	51699	up	1.54	1.37
LOC100133840	100133840	up	1.54	1.34
SLC35B3	51000	up	1.54	1.33
DPH3	285381	up	1.54	1.35
SORL1	6653	up	1.54	1.33
LOC727984	727984	up	1.54	1.36
RACGAP1	29127	up	1.55	1.34
LOC100129742	100129742	up	1.55	1.4
LZTR1	8216	up	1.55	1.36
C18orf32	497661	up	1.55	1.33
ING5	84289	up	1.55	1.32
ZFAND6	54469	up	1.55	1.33
LOC100129141	100129141	up	1.55	1.4
LOC646527	646527	up	1.55	1.33
C17orf42	79736	up	1.56	1.35
NUMB	8650	up	1.56	1.34
NIPA1	123606	up	1.56	1.34
SS18	6760	up	1.56	1.37
LOC100128760	100128760	up	1.56	1.32
MAPK9	5601	up	1.56	1.36
PIAS2	9063	up	1.56	1.34
MON2	23041	up	1.56	1.33
RPA2	6118	up	1.56	1.37
RRP12	23223	up	1.56	1.34
SGOL2	151246	up	1.56	1.32
LOC642477	642477	up	1.56	1.35
FLJ44342	645460	up	1.56	1.33
NCRNA00081	92482	up	1.56	1.33
ALKBH3	221120	up	1.56	1.35
LOC100132457	100132457	up	1.56	1.38
NMD3	51068	up	1.56	1.36
HNRPK	3190	up	1.56	1.37
C16orf52	146174	up	1.56	1.33
AASS	10157	up	1.56	1.33
C5orf41	153222	up	1.56	1.32
C12orf60	144608	up	1.56	1.32
GEM	2669	up	1.57	1.35
PCM1	5108	up	1.57	1.35
DLX1	1745	up	1.57	1.34
ISCA1L	389293	up	1.57	1.37
HDDC2	51020	up	1.57	1.38
LOC389322	389322	up	1.57	1.38
TTC4	7268	up	1.57	1.37
GCOM1	145781	up	1.57	1.33
SLC4A1AP	22950	up	1.57	1.34
KIAA0831	22863	up	1.57	1.34
TIMM9	26520	up	1.57	1.36
RNF11	26994	up	1.57	1.35
PBX2	5089	up	1.57	1.34
ZC3H8	84524	up	1.57	1.34
SLTM	79811	up	1.57	1.34
WDR51B	282809	up	1.57	1.33
ZSWIM6	57688	up	1.57	1.34
STK38	11329	up	1.57	1.36
PPFIA1	8500	up	1.58	1.35
FAM127C	441518	up	1.58	1.33
SIRT5	23408	up	1.58	1.34
SETD3	84193	up	1.58	1.34
FLJ20628	55006	up	1.58	1.34
LOC389156	389156	up	1.58	1.37
ZNF124	7678	up	1.58	1.34
WDR43	23160	up	1.58	1.36
SLC35F5	80255	up	1.58	1.36
NBN	4683	up	1.58	1.34
PHAX	51808	up	1.58	1.37
MEX3A	92312	up	1.58	1.34
MED31	51003	up	1.58	1.36
GGCX	2677	up	1.58	1.33
ADSS	159	up	1.58	1.36
ZNF189	7743	up	1.58	1.34
ANKRD32	84250	up	1.58	1.33
HIGD1A	25994	up	1.58	1.39
LOC441377	441377	up	1.58	1.37
PECI	10455	up	1.59	1.38
PXMP3	5828	up	1.59	1.36
ARID5B	84159	up	1.59	1.35
LOC728843	728843	up	1.59	1.36
OFD1	8481	up	1.59	1.34
C9orf82	79886	up	1.59	1.34
GNL3	26354	up	1.59	1.38
LOC653156	653156	up	1.59	1.36
KTN1	3895	up	1.59	1.34
STRN	6801	up	1.59	1.34
EIF2B3	8891	up	1.59	1.36
DCBLD1	285761	up	1.59	1.35
GCSH	2653	up	1.59	1.39
TSGA14	95681	up	1.59	1.35
SEMA3A	10371	up	1.59	1.35
FRAT2	23401	up	1.59	1.36
GLMN	11146	up	1.59	1.37
LOC642236	642236	up	1.59	1.37
NDC80	10403	up	1.6	1.35
ZBTB34	403341	up	1.6	1.35
NCRNA00152	112597	up	1.6	1.34
UBE4B	10277	up	1.6	1.37
CHD1	1105	up	1.6	1.36
FLJ45248	401472	up	1.6	1.33
ZNF556	80032	up	1.6	1.35
NSUN4	387338	up	1.6	1.36
HSPC157	29092	up	1.6	1.35
HEY1	23462	up	1.6	1.33
NUBP1	4682	up	1.6	1.36
PLEKHA5	54477	up	1.6	1.34
FGGY	55277	up	1.6	1.35
SUPT3H	8464	up	1.6	1.34
APOOL	139322	up	1.6	1.35
LOC493869	493869	up	1.6	1.37
CSNK2A1P	283106	up	1.6	1.35
TMEM126B	55863	up	1.6	1.39
TMEM66	51669	up	1.6	1.39
LOC100128881	100128881	up	1.6	1.33
LOC642934	642934	up	1.6	1.35
LOC653702	653702	up	1.6	1.35
TSEN15	116461	up	1.6	1.34
HSDL2	84263	up	1.61	1.37
BAT1	7919	up	1.61	1.39
NUDT2	318	up	1.61	1.37
DNAJC5	80331	up	1.61	1.35
POLG2	11232	up	1.61	1.35
DGUOK	1716	up	1.61	1.36
EED	8726	up	1.61	1.36
ME2	4200	up	1.61	1.36
RAPGEF1	2889	up	1.61	1.38
EGFLAM	133584	up	1.61	1.34
NOC4L	79050	up	1.61	1.34
USP33	23032	up	1.61	1.35
SNORD96A	619571	up	1.61	1.37
CSNK1G1	53944	up	1.61	1.36
NR2F6	2063	up	1.62	1.38
C21orf33	8209	up	1.62	1.35
KIAA0196	9897	up	1.62	1.37
AUTS2	26053	up	1.62	1.35
YPEL5	51646	up	1.62	1.35
PTGER4	5734	up	1.62	1.36
CCT6P1	643253	up	1.62	1.35
DSG2	1829	up	1.62	1.35
PPP3CA	5530	up	1.62	1.33
CARM1	10498	up	1.62	1.39
DCAF6	55827	up	1.62	1.36
AP4B1	10717	up	1.62	1.36
TIAL1	7073	up	1.62	1.36
LOC729148	729148	up	1.62	1.37
RIPK4	54101	up	1.62	1.36
LOC339970	339970	up	1.62	1.37
LOC728115	728115	up	1.62	1.36
RAP1B	5908	up	1.62	1.35
FAM10A7	155019	up	1.62	1.36
TAF9	6880	up	1.62	1.39
P4HA2	8974	up	1.62	1.32
KIAA0586	9786	up	1.62	1.35
SNX7	51375	up	1.63	1.34
DDX59	83479	up	1.63	1.36
TMF1	7110	up	1.63	1.35
ORC5L	5001	up	1.63	1.38
TAF13	6884	up	1.63	1.35
LOC653566	653566	up	1.63	1.39
XAF1	54739	up	1.63	1.35
KIAA0947	23379	up	1.63	1.38
SETD6	79918	up	1.63	1.35
DDX1	1653	up	1.63	1.4
CCDC90A	63933	up	1.63	1.39
DPAGT1	1798	up	1.63	1.37
CCDC97	90324	up	1.63	1.37
NPC1	4864	up	1.63	1.38
IGF2BP3	10643	up	1.64	1.39
C11orf59	55004	up	1.64	1.38
LOC643446	643446	up	1.64	1.35
MTHFR	4524	up	1.64	1.35
CENPL	91687	up	1.64	1.36
PABPC4	8761	up	1.64	1.4
LGALS3	3958	up	1.64	1.37
SNORA14B	677802	up	1.64	1.35
ZNF260	339324	up	1.64	1.36
MAD2L1	4085	up	1.64	1.4
LOC100128410	100128410	up	1.64	1.39
MT1G	4495	up	1.65	1.36
TMEM77	128338	up	1.65	1.35
MED25	81857	up	1.65	1.35
TBC1D15	64786	up	1.65	1.38
SDHD	6392	up	1.65	1.38
PIGN	23556	up	1.65	1.35
KIAA1012	22878	up	1.65	1.37
LOC647195	647195	up	1.65	1.34
PDE3B	5140	up	1.65	1.36
SDCCAG1	9147	up	1.65	1.37
PKD2	5311	up	1.65	1.34
TXNDC17	84817	up	1.65	1.42
[truncated: 1,511 more rows]
